# Supplementary material for: Microwave-synthesized narrow emitting carbon dots and their tunable fluorescence for sensing applications
Source: Royal Society of Chemistry journal article supplement (doi:10.1039/d3nj02694a), 2023-01-01
Supplement: d3nj02694a1.pdf [file d3nj02694a1.pdf]

## **Electronic supplementary information**

### **Microwave-Synthesized Narrow Emitting Carbon Dots and Their Tunable Fluorescence for Sensing Application**

Xiao-Lan Wei,<sup>\*a</sup> Qin-Lin Shi,<sup>a</sup> Lan Jiang<sup>a</sup> and Yu Qing<sup>a</sup>

College of Environment and Resources, Chongqing Technology and Business University,  
Chongqing 400067, China. E-mail: [weishine@ctbu.edu.cn](mailto:weishine@ctbu.edu.cn)

**Table S1.** Previous reports of solvothermal (ST) preparation of narrow emissive CDs and microwave-assisted solvothermal (MST) preparation of CDs

| Precursor <sup>a</sup> | Synthetic method (solvent)                | Purification  | FWHM (nm) | $\lambda_{em}$ (nm) | Refs      |
|------------------------|-------------------------------------------|---------------|-----------|---------------------|-----------|
| CA, DAN.               | ST (EtOH)                                 | Col. chromat. | 35        | 433                 | 1         |
| p-PDA                  | ST (EtOH)                                 | Dialysis      | 48        | 603                 | 2         |
| APTMs, EB              | ST (H <sub>2</sub> O)                     | Dialysis      | 38        | 516                 | 3         |
| PG                     | ST (1,2-PeD)                              | Dialysis      | 30        | 481                 | 4         |
| PG                     | ST (EtOH)                                 | Col. chromat. | 30        | 507                 | 5         |
| ATA <sup>c</sup> , PEG | MST (80% H <sub>3</sub> PO <sub>4</sub> ) | Dialysis      | 132       | 410                 | 6         |
| o-PDA, urea            | MST (H <sub>2</sub> O)                    | Filtration    | 85        | 570                 | 7         |
| Ascorbic acid          | MST (H <sub>2</sub> O)                    | None          | 90        | 437                 | 8         |
| CA, urea               | MST (H <sub>2</sub> O)                    | None          | 88        | 521                 | 9         |
| PG                     | MST (EDA)                                 | None          | 104       | 480                 | 10        |
| PG                     | MST (EG)                                  | None          | 62        | 537                 | 11        |
| PG                     | MH (EG+H <sub>2</sub> O)                  | Precipitation | 35        | 485                 | This work |

<sup>a</sup> abbreviations of precursors: Citric acid (CA), Diaminonaphthalene (DAN), p-Phenylenediamine (p-PDA), (3-Aminopropyl) tri-Methoxysilane ethylenediamine (APTMs), Erythrosin B (EB), 2-Aminoterephthalic acid (ATA), o-Phenylenediamine (o-PDA), 1,2-Pentanediol (1,2-PeD)

**Table S2.** Proportions of various chemical bonding states in the two carbon dots

|       | C1s<br>(CDs: 72.2%, S-CDs: 71.3%) |         |        | O1s<br>(CDs: 27.8%, S-CDs: 25.5%) |       |       | S2p<br>(S-CDs: 3.2%) |        |
|-------|-----------------------------------|---------|--------|-----------------------------------|-------|-------|----------------------|--------|
|       | C=C/C-C                           | C-O/C-S | C=O    | C-O                               | C=O   | O-C=O | S2p1/2               | S2p3/2 |
|       | S-free CDs                        | 68.8%   | 18.9 % | 12.3%                             | 63.4% | 36.6% | —                    | —      |
| S-CDs | 67.2%                             | 22.6 %  | 10.2%  | 64.6 %                            | 28.4% | 7%    | 28.5%                | 71.5 % |

**Table S3.** Spiked recovery experiments for the detection of water in organic solvent samples by S-CDs (n = 5)

| Sample | Detected (%) | Added (%) | Found (%) | Recovery (%) | RSD (%) |
|--------|--------------|-----------|-----------|--------------|---------|
| EG     | 2.58         | 2         | 4.77      | 104.15       | 1.42    |
|        |              | 4         | 6.46      | 98.17        | 0.85    |
|        |              | 8         | 10.80     | 102.08       | 0.61    |
| DMF    | —            | 2         | 2.15      | 107.50       | 2.33    |
|        |              | 4         | 4.13      | 103.25       | 1.51    |
|        |              | 8         | 7.74      | 96.75        | 1.40    |
| DMSO   | —            | 2         | 1.94      | 97.00        | 0.97    |
|        |              | 4         | 4.22      | 105.50       | 1.71    |
|        |              | 8         | 8.69      | 108.63       | 1.39    |

## References

1. F. Yuan, Y. Wang, G. Sharma, Y. Dong, X. Zheng, P. Li, A. Johnston, G. Bappi, J. Z. Fan and H. Kung, *Nat. Photonics*, 2020, 14, 171-176.
2. Y. Liu, H. Gou, X. Huang, G. Zhang, K. Xi and X. Jia, *Nanoscale*, 2020, **12**, 1589-1601.
3. J. Chen, W. Liu, Y. Li, X. Zou, W. Li, J. Liang, H. Zhang, Y. Liu, X. Zhang and C. Hu, *Chem. Eng. J.*, 2022, **428**, 131168.
4. T. Yoshinaga, M. Shinoda, Y. Iso, T. Isobe, A. Ogura and K. Takao, *Acs omega*, 2021, **6**, 1741-1750.
5. F. Yuan, T. Yuan, L. Sui, Z. Wang, Z. Xi, Y. Li, X. Li, L. Fan, Z. A. Tan and A. Chen, *Nat. Commun.*, 2018, **9**, 1-11.
6. T. Vidya, M. Anupama, S. Muhammed, J. Joseph and A. A. Anappara, *Mater. Res. Bull.*, 2021, **138**, 111223.
7. O. Erguder, S. Şahin Keskin, I. Nar, L. Trabzon and C. Unlu, *Acs Omega*, 2022, **7**, 29297-29305.
8. R. Sofin, A. Issac, M. Al-Naabi, M. Z. Myint, H. H. Kyaw and O. K. Abou-Zied, *Spectrochim Acta. A.*, 2022, **266**, 120442.
9. I. Alkian, A. Prasetyo, L. Anggara, M. H. Fonisyah, Z. M. Rizka and H. Widiyandari, *J. Phys. Conf. Ser.*, 2019, **p.** 12093.
10. K. R. Vijesh, T. Thomas, M. Vaishakh, V. Nampoori and S. Thomas, *Optik*, 2021, **248**, 168049.
11. X. L. Wei, Q. L. Shi, L. Jiang and Y. Qin, *Carbon Lett.*, 2023, **33**, 191-201.
